# Supplementary material for: The Back Belief Questionnaire is efficient to assess false beliefs and related fear in low back pain populations: A transcultural adaptation and validation study
Source: PubMed Central journal article supplement (PMC5718465; doi:10.1371/journal.pone.0186753), 2017-12-06
Supplement: pone.0186753.s002.pdf [file pone.0186753.s002.pdf]

| id      | centre | gender | age | lbp_duration | d1_bbq_coll | d1_bbq_comp | d1_bbq_nfill | d1_bbq_q1 |
|---------|--------|--------|-----|--------------|-------------|-------------|--------------|-----------|
| C01P001 | C01    | Female | 39  | 72           | Yes         | Yes         | 1            | 4         |
| C01P002 | C01    | Female | 34  | 6            | Yes         | Yes         | 0            | 2         |
| C01P003 | C01    | Male   | 50  | 312          | Yes         | Yes         | 0            | 5         |
| C01P004 | C01    | Male   | 32  | 13           | Yes         | Yes         | 0            | 5         |
| C01P005 | C01    | Male   | 53  | 47           | Yes         | Yes         | 0            | 4         |
| C01P006 | C01    | Female | 50  | 133          | Yes         | Yes         | 0            | 4         |
| C01P007 | C01    | Female | 48  | 47           | Yes         | Yes         | 0            | 1         |
| C01P008 | C01    | Female | 42  | 23           | Yes         | Yes         | 0            | 2         |
| C01P009 | C01    | Female | 61  | 18           | Yes         | Yes         | 0            | 3         |
| C01P010 | C01    | Male   | 46  | 77           | Yes         | Yes         | 0            | 3         |
| C01P011 | C01    | Male   | 54  | 12           | Yes         | Yes         | 0            | 5         |
| C01P012 | C01    | Male   | 57  | 180          | Yes         | Yes         | 0            | 1         |
| C01P013 | C01    | Female | 42  | 8            | Yes         | Yes         | 0            | 2         |
| C01P014 | C01    | Male   | 29  | 120          | Yes         | Yes         | 0            | 2         |
| C01P015 | C01    | Male   | 50  | 3            | Yes         | Yes         | 0            | 4         |
| C01P016 | C01    | Female | 60  | 85           | Yes         | Yes         | 0            | 4         |
| C01P017 | C01    | Female | 39  | 86           | Yes         | Yes         | 0            | 2         |
| C01P018 | C01    | Female | 29  | 62           | No          | No          | 14           | .         |
| C01P019 | C01    | Female | 32  | 2            | Yes         | Yes         | 0            | 4         |
| C01P020 | C01    | Female | 50  | 110          | Yes         | Yes         | 0            | 2         |
| C01P021 | C01    | Female | 54  | 7            | No          | No          | 14           | .         |
| C01P022 | C01    | Female | 51  | 362          | Yes         | Yes         | 0            | 3         |
| C01P023 | C01    | Male   | 53  | 210          | Yes         | Yes         | 0            | 2         |
| C01P024 | C01    | Female | 51  | 18           | Yes         | Yes         | 0            | 5         |
| C01P025 | C01    | Male   | 57  | 234          | Yes         | Yes         | 0            | 5         |
| C01P026 | C01    | Male   | 43  | 271          | Yes         | Yes         | 0            | 1         |
| C01P027 | C01    | Female | 46  | 247          | Yes         | Yes         | 0            | 3         |
| C01P028 | C01    | Female | 42  | 7            | Yes         | Yes         | 0            | 3         |
| C01P029 | C01    | Female | 37  | 199          | Yes         | Yes         | 0            | 1         |
| C01P030 | C01    | Male   | 33  | 8            | Yes         | Yes         | 0            | 3         |
| C01P031 | C01    | Female | 41  | 188          | Yes         | Yes         | 0            | 1         |
| C01P032 | C01    | Female | 49  | 18           | Yes         | Yes         | 1            | 3         |
| C01P033 | C01    | Female | 50  | 176          | Yes         | Yes         | 0            | 4         |
| C01P034 | C01    | Male   | 47  | 56           | Yes         | Yes         | 0            | 3         |
| C01P035 | C01    | Female | 51  | 105          | Yes         | Yes         | 0            | 4         |
| C01P036 | C01    | Male   | 52  | 13           | Yes         | Yes         | 0            | 3         |
| C01P037 | C01    | Male   | 25  | 8            | Yes         | Yes         | 0            | 3         |
| C01P038 | C01    | Female | 50  | 81           | Yes         | Yes         | 0            | 2         |
| C01P039 | C01    | Female | 57  | 117          | Yes         | Yes         | 0            | 2         |
| C01P040 | C01    | Male   | 53  | 18           | Yes         | Yes         | 0            | 3         |
| C01P041 | C01    | Male   | 50  | 22           | Yes         | Yes         | 0            | 3         |
| C01P042 | C01    | Male   | 34  | 22           | Yes         | Yes         | 0            | 3         |
| C01P043 | C01    | Male   | 44  | 202          | Yes         | Yes         | 0            | 3         |
| C01P044 | C01    | Female | 68  | 214          | Yes         | Yes         | 0            | 4         |
| C01P045 | C01    | Male   | 34  | 94           | Yes         | Yes         | 0            | 1         |
| C01P046 | C01    | Female | 34  | 34           | Yes         | Yes         | 0            | 2         |
| C01P047 | C01    | Male   | 27  | 8            | Yes         | Yes         | 0            | 3         |
| C01P048 | C01    | Male   | 31  | 180          | Yes         | Yes         | 0            | 2         |

|         |     |        |    |     |     |     |   |   |
|---------|-----|--------|----|-----|-----|-----|---|---|
| C01P049 | C01 | Female | 30 | 24  | Yes | Yes | 0 | 5 |
| C01P050 | C01 | Male   | 35 | 14  | Yes | Yes | 0 | 1 |
| C01P051 | C01 | Female | 25 | 17  | Yes | Yes | 0 | 2 |
| C01P052 | C01 | Male   | 56 | 121 | Yes | Yes | 0 | 2 |
| C01P053 | C01 | Male   | 33 | 8   | Yes | Yes | 0 | 4 |
| C01P054 | C01 | Female | 61 | 121 | Yes | Yes | 0 | 3 |
| C01P055 | C01 | Female | 46 | 19  | Yes | Yes | 0 | 3 |
| C01P056 | C01 | Male   | 56 | 11  | Yes | Yes | 0 | 4 |
| C01P057 | C01 | Female | 49 | 27  | Yes | Yes | 0 | 4 |
| C01P058 | C01 | Male   | 53 | 219 | Yes | Yes | 0 | 1 |
| C01P059 | C01 | Male   | 40 | 12  | Yes | Yes | 0 | 1 |
| C01P060 | C01 | Male   | 67 | 400 | Yes | Yes | 0 | 3 |
| C01P061 | C01 | Male   | 44 | 196 | Yes | Yes | 0 | 3 |
| C01P062 | C01 | Female | 42 | 12  | Yes | Yes | 0 | 3 |
| C01P063 | C01 | Male   | 34 | 12  | Yes | Yes | 0 | 1 |
| C01P064 | C01 | Male   | 31 | 28  | Yes | Yes | 1 | 3 |
| C01P065 | C01 | Female | 37 | 15  | Yes | Yes | 0 | 4 |
| C01P066 | C01 | Female | 44 | 125 | Yes | Yes | 0 | 4 |
| C01P067 | C01 | Male   | 31 | 29  | Yes | Yes | 0 | 1 |
| C01P068 | C01 | Male   | 39 | 17  | Yes | Yes | 1 | 3 |
| C01P069 | C01 | Female | 39 | 53  | Yes | Yes | 0 | 5 |
| C01P070 | C01 | Male   | 31 | 18  | Yes | Yes | 0 | 1 |
| C01P071 | C01 | Female | 36 | 19  | Yes | Yes | 0 | 4 |
| C01P072 | C01 | Male   | 50 | 42  | Yes | Yes | 0 | 1 |
| C01P073 | C01 | Male   | 45 | 378 | Yes | Yes | 1 | 3 |
| C01P074 | C01 | Female | 50 | 30  | Yes | Yes | 0 | 1 |
| C01P075 | C01 | Male   | 33 | 67  | Yes | Yes | 0 | 4 |
| C01P076 | C01 | Male   | 28 | 19  | Yes | Yes | 0 | 4 |
| C01P077 | C01 | Female | 56 | 55  | Yes | Yes | 0 | 5 |
| C01P078 | C01 | Male   | 37 | 53  | Yes | Yes | 0 | 2 |
| C01P079 | C01 | Male   | 32 | 4   | Yes | Yes | 0 | 5 |
| C01P080 | C01 | Male   | 36 | 80  | Yes | Yes | 0 | 4 |
| C01P081 | C01 | Female | 57 | 119 | Yes | Yes | 0 | 3 |
| C01P082 | C01 | Female | 44 | 56  | Yes | Yes | 0 | 4 |
| C01P083 | C01 | Male   | 42 | 10  | Yes | Yes | 0 | 3 |
| C01P084 | C01 | Male   | 56 | 344 | Yes | Yes | 0 | 3 |
| C01P085 | C01 | Female | 34 | 141 | Yes | Yes | 0 | 3 |
| C01P086 | C01 | Male   | 30 | 15  | Yes | Yes | 0 | 3 |
| C01P087 | C01 | Female | 55 | 369 | Yes | Yes | 1 | 3 |
| C01P088 | C01 | Female | 54 | 129 | Yes | Yes | 0 | 2 |
| C01P089 | C01 | Female | 53 | 7   | Yes | Yes | 0 | 4 |
| C01P090 | C01 | Female | 32 | 19  | Yes | Yes | 0 | 1 |
| C01P091 | C01 | Male   | 25 | 11  | Yes | Yes | 0 | 3 |
| C01P092 | C01 | Female | 26 | 178 | Yes | Yes | 0 | 5 |
| C01P093 | C01 | Male   | 42 | 49  | Yes | Yes | 0 | 1 |
| C01P094 | C01 | Male   | 58 | 34  | Yes | Yes | 0 | 3 |
| C01P095 | C01 | Female | 37 | 203 | Yes | Yes | 0 | 4 |
| C01P096 | C01 | Female | 42 | 20  | Yes | Yes | 0 | 3 |
| C01P097 | C01 | Female | 44 | 28  | Yes | Yes | 0 | 4 |
| C01P098 | C01 | Male   | 41 | 36  | Yes | Yes | 0 | 3 |

|         |     |        |    |     |     |     |    |   |
|---------|-----|--------|----|-----|-----|-----|----|---|
| C01P099 | C01 | Female | 45 | 71  | Yes | Yes | 0  | 2 |
| C01P100 | C01 | Female | 62 | 71  | Yes | Yes | 0  | 4 |
| C01P101 | C01 | Male   | 57 | 47  | Yes | Yes | 0  | 1 |
| C01P102 | C01 | Female | 47 | 28  | Yes | Yes | 0  | 3 |
| C01P103 | C01 | Male   | 32 | 72  | Yes | Yes | 0  | 1 |
| C01P104 | C01 | Male   | 55 | 138 | Yes | Yes | 0  | 3 |
| C01P105 | C01 | Male   | 48 | 168 | Yes | Yes | 0  | 5 |
| C02P002 | C02 | Male   | 39 | .   | Yes | Yes | 0  | 3 |
| C02P003 | C02 | Male   | 54 | 217 | Yes | Yes | 0  | 4 |
| C02P004 | C02 | Female | 51 | 43  | Yes | Yes | 0  | 5 |
| C02P005 | C02 | Female | 56 | 105 | Yes | Yes | 0  | 2 |
| C02P006 | C02 | Female | 43 | 26  | Yes | Yes | 10 | . |
| C02P007 | C02 | Male   | 43 | 45  | Yes | Yes | 0  | 4 |
| C02P008 | C02 | Male   | 55 | 183 | Yes | Yes | 0  | 4 |
| C02P009 | C02 | Male   | 37 | 73  | Yes | Yes | 0  | 5 |
| C02P010 | C02 | Male   | 23 | 14  | Yes | Yes | 0  | 5 |
| C02P011 | C02 | Female | 24 | 11  | Yes | Yes | 0  | 2 |
| C02P012 | C02 | Male   | 45 | 204 | Yes | Yes | 0  | 3 |
| C02P013 | C02 | Female | 38 | .   | Yes | Yes | 0  | 2 |
| C02P014 | C02 | Male   | 36 | .   | Yes | Yes | 0  | 2 |
| C02P015 | C02 | Female | 42 | 49  | Yes | Yes | 0  | 3 |
| C02P016 | C02 | Male   | 49 | .   | Yes | Yes | 0  | 4 |
| C02P017 | C02 | Male   | 34 | .   | Yes | Yes | 0  | 1 |
| C02P018 | C02 | Male   | 38 | 313 | Yes | Yes | 0  | 3 |
| C02P019 | C02 | Male   | 44 | .   | Yes | Yes | 1  | 1 |
| C02P020 | C02 | Female | 43 | 271 | Yes | Yes | 0  | 3 |
| C02P021 | C02 | Female | 48 | .   | Yes | Yes | 0  | 3 |
| C02P023 | C02 | Female | 53 | 49  | Yes | Yes | 0  | 4 |
| C02P025 | C02 | Male   | 49 | 31  | Yes | Yes | 0  | 1 |
| C02P026 | C02 | Female | 34 | 224 | Yes | Yes | 0  | 2 |

| d1_bbq_q2 | d1_bbq_q3 | d1_bbq_q4 | d1_bbq_q5 | d1_bbq_q6 | d1_bbq_q7 | d1_bbq_q8 | d1_bbq_q9 |
|-----------|-----------|-----------|-----------|-----------|-----------|-----------|-----------|
| 5         | 5         | 4         | 5         | 5         | 1         | 3         | .         |
| 5         | 1         | 1         | 5         | 5         | 1         | 1         | 4         |
| 5         | 5         | 3         | 4         | 4         | 2         | 4         | 2         |
| 5         | 5         | 4         | 4         | 5         | 1         | 3         | 5         |
| 5         | 5         | 3         | 3         | 5         | 3         | 2         | 1         |
| 5         | 4         | 3         | 3         | 5         | 1         | 1         | 3         |
| 3         | 3         | 1         | 5         | 5         | 3         | 4         | 1         |
| 4         | 5         | 3         | 3         | 5         | 5         | 1         | 1         |
| 4         | 5         | 3         | 4         | 4         | 2         | 5         | 2         |
| 5         | 5         | 3         | 3         | 5         | 3         | 3         | 1         |
| 2         | 4         | 1         | 1         | 5         | 2         | 2         | 1         |
| 2         | 2         | 1         | 3         | 3         | 2         | 1         | 1         |
| 5         | 5         | 5         | 5         | 5         | 2         | 3         | 1         |
| 4         | 5         | 2         | 4         | 4         | 3         | 3         | 2         |
| 4         | 4         | 3         | 4         | 3         | 1         | 1         | 3         |
| 5         | 5         | 2         | 4         | 5         | 3         | 1         | 3         |
| 5         | 3         | 1         | 4         | 5         | 2         | 2         | 3         |
| .         | .         | .         | .         | .         | .         | .         | .         |
| 5         | 5         | 1         | 5         | 5         | 2         | 1         | 2         |
| 3         | 5         | 4         | 5         | 4         | 2         | 1         | 2         |
| .         | .         | .         | .         | .         | .         | .         | .         |
| 5         | 4         | 4         | 3         | 5         | 3         | 4         | 4         |
| 5         | 2         | 1         | 5         | 5         | 1         | 1         | 3         |
| 1         | 1         | 5         | 1         | 1         | 5         | 1         | 1         |
| 4         | 5         | 4         | 3         | 5         | 2         | 1         | 1         |
| 5         | 5         | 1         | 5         | 5         | 5         | 1         | 1         |
| 5         | 5         | 1         | 3         | 5         | 3         | 3         | 3         |
| 5         | 4         | 3         | 5         | 5         | 1         | 1         | 4         |
| 5         | 5         | 1         | 5         | 5         | 1         | 3         | 5         |
| 3         | 2         | 2         | 3         | 5         | 2         | 1         | 1         |
| 4         | 3         | 4         | 5         | 3         | 1         | 1         | 3         |
| 5         | 5         | 5         | 5         | 5         | 1         | 1         | .         |
| 2         | 4         | 2         | 5         | 3         | 1         | 4         | 2         |
| 5         | 5         | 3         | 3         | 5         | 3         | 2         | 1         |
| 4         | 5         | 4         | 5         | 5         | 1         | 1         | 1         |
| 5         | 3         | 2         | 3         | 5         | 1         | 1         | 3         |
| 3         | 5         | 2         | 4         | 5         | 3         | 2         | 3         |
| 3         | 3         | 2         | 5         | 5         | 3         | 1         | 2         |
| 5         | 5         | 3         | 3         | 5         | 2         | 2         | 3         |
| 3         | 5         | 3         | 2         | 4         | 2         | 2         | 3         |
| 4         | 2         | 1         | 1         | 2         | 4         | 1         | 3         |
| 4         | 4         | 3         | 4         | 5         | 2         | 4         | 4         |
| 5         | 5         | 3         | 5         | 3         | 2         | 3         | 3         |
| 1         | 3         | 2         | 5         | 1         | 1         | 5         | 5         |
| 2         | 3         | 1         | 5         | 5         | 1         | 1         | 3         |
| 5         | 5         | 2         | 5         | 3         | 3         | 4         | 3         |
| 3         | 5         | 3         | 3         | 5         | 3         | 3         | 1         |
| 5         | 2         | 1         | 4         | 2         | 2         | 1         | 3         |

|   |   |   |   |   |   |   |   |
|---|---|---|---|---|---|---|---|
| 4 | 5 | 5 | 4 | 5 | 4 | 5 | 3 |
| 5 | 2 | 2 | 5 | 5 | 3 | 2 | 2 |
| 2 | 4 | 1 | 5 | 4 | 1 | 1 | 3 |
| 3 | 4 | 2 | 5 | 5 | 1 | 1 | 3 |
| 5 | 5 | 3 | 3 | 5 | 1 | 1 | 5 |
| 4 | 4 | 3 | 1 | 4 | 4 | 1 | 2 |
| 3 | 5 | 4 | 5 | 5 | 1 | 1 | 3 |
| 3 | 5 | 4 | 3 | 4 | 1 | 1 | 2 |
| 5 | 4 | 3 | 5 | 5 | 3 | 3 | 5 |
| 3 | 1 | 1 | 1 | 4 | 1 | 1 | 1 |
| 5 | 3 | 1 | 5 | 5 | 1 | 3 | 3 |
| 4 | 4 | 3 | 2 | 2 | 1 | 3 | 2 |
| 2 | 2 | 3 | 1 | 1 | 3 | 5 | 3 |
| 1 | 3 | 1 | 5 | 4 | 1 | 1 | 1 |
| 5 | 3 | 1 | 5 | 5 | 3 | 1 | 3 |
| 5 | 4 | 4 | 5 | 5 | 1 | 1 | . |
| 4 | 5 | 4 | 5 | 5 | 1 | 1 | 3 |
| 5 | 5 | 4 | 4 | 5 | 3 | 1 | 1 |
| 3 | 3 | 1 | 3 | 2 | 3 | 1 | 3 |
| 5 | 2 | 3 | . | 5 | 3 | 1 | 3 |
| 5 | 5 | 1 | 1 | 5 | 1 | 1 | 5 |
| 4 | 2 | 1 | 5 | 3 | 1 | 1 | 5 |
| 4 | 4 | 5 | 5 | 5 | 3 | 1 | 3 |
| 5 | 5 | 1 | 5 | 5 | 1 | 1 | 3 |
| 4 | 5 | 3 | 5 | 5 | 1 | 1 | . |
| 1 | 2 | 1 | 5 | 2 | 1 | 1 | 3 |
| 4 | 4 | 4 | 4 | 4 | 3 | 3 | 3 |
| 4 | 4 | 3 | 4 | 4 | 4 | 2 | 2 |
| 5 | 3 | 5 | 3 | 5 | 3 | 1 | 3 |
| 3 | 3 | 2 | 5 | 3 | 1 | 1 | 3 |
| 4 | 5 | 3 | 3 | 5 | 3 | 3 | 3 |
| 5 | 5 | 4 | 3 | 5 | 2 | 3 | 3 |
| 5 | 5 | 3 | 3 | 5 | 2 | 1 | 2 |
| 3 | 4 | 2 | 4 | 3 | 1 | 1 | 3 |
| 3 | 2 | 4 | 3 | 3 | 3 | 1 | 2 |
| 3 | 5 | 2 | 5 | 4 | 2 | 1 | 3 |
| 4 | 4 | 2 | 4 | 5 | 1 | 1 | 2 |
| 5 | 4 | 3 | 5 | 5 | 3 | 1 | 3 |
| 5 | 5 | 3 | . | 3 | 2 | 1 | 3 |
| 5 | 5 | 3 | 3 | 3 | 1 | 1 | 2 |
| 5 | 5 | 4 | 4 | 5 | 3 | 4 | 3 |
| 5 | 5 | 1 | 4 | 5 | 2 | 2 | 2 |
| 4 | 4 | 3 | 5 | 5 | 1 | 3 | 3 |
| 1 | 3 | 1 | 5 | 1 | 1 | 1 | 1 |
| 5 | 1 | 1 | 5 | 5 | 3 | 1 | 1 |
| 4 | 4 | 3 | 5 | 5 | 3 | 1 | 5 |
| 4 | 4 | 2 | 3 | 4 | 3 | 2 | 4 |
| 4 | 4 | 4 | 5 | 3 | 4 | 4 | 3 |
| 5 | 4 | 5 | 5 | 5 | 1 | 1 | 3 |
| 5 | 5 | 3 | 5 | 3 | 1 | 1 | 3 |

|   |   |   |   |   |   |   |   |
|---|---|---|---|---|---|---|---|
| 5 | 5 | 3 | 3 | 5 | 3 | 1 | 1 |
| 5 | 4 | 4 | 5 | 4 | 2 | 2 | 2 |
| 5 | 5 | 3 | 1 | 5 | 3 | 3 | 3 |
| 3 | 3 | 3 | 1 | 1 | 3 | 3 | 3 |
| 3 | 1 | 1 | 5 | 3 | 3 | 1 | 3 |
| 5 | 5 | 3 | 4 | 5 | 3 | 3 | 1 |
| 1 | 3 | 5 | 5 | 5 | 1 | 1 | 1 |
| 5 | 3 | 2 | 4 | 4 | 2 | 3 | 1 |
| 5 | 5 | 4 | 4 | 5 | 4 | 4 | 3 |
| 3 | 5 | 5 | 5 | 5 | 3 | 3 | 4 |
| 2 | 4 | 2 | 5 | 5 | 3 | 3 | 1 |
| . | 2 | . | . | 1 | 2 | . | . |
| 5 | 4 | 4 | 5 | 5 | 3 | 4 | 3 |
| 5 | 5 | 4 | 1 | 5 | 1 | 3 | 2 |
| 3 | 5 | 3 | 2 | 4 | 3 | 3 | 2 |
| 4 | 3 | 3 | 5 | 5 | 2 | 5 | 2 |
| 4 | 4 | 2 | 4 | 4 | 1 | 1 | 3 |
| 1 | 5 | 4 | 5 | 3 | 3 | 1 | 3 |
| 3 | 3 | 1 | 2 | 5 | 1 | 1 | 1 |
| 4 | 3 | 5 | 3 | 5 | 5 | 3 | 2 |
| 5 | 4 | 3 | 3 | 5 | 5 | 3 | 5 |
| 3 | 4 | 3 | 5 | 5 | 1 | 1 | 3 |
| 1 | 3 | 1 | 1 | 3 | 2 | 1 | 4 |
| 4 | 3 | 3 | 3 | 3 | 1 | 3 | 3 |
| 5 | 5 | 1 | 5 | 5 | 1 | 1 | . |
| 5 | 3 | 3 | 4 | 5 | 3 | 1 | 3 |
| 5 | 3 | 3 | 5 | 5 | 3 | 5 | 3 |
| 5 | 5 | 4 | 5 | 5 | 4 | 1 | 2 |
| 3 | 3 | 1 | 3 | 5 | 3 | 1 | 2 |
| 1 | 4 | 2 | 3 | 5 | 1 | 1 | 4 |

| d1_bbq_q10 | d1_bbq_q11 | d1_bbq_q12 | d1_bbq_q13 | d1_bbq_q14 | d1_bbq | d1_fabq | d7_attend | d7_pain |
|------------|------------|------------|------------|------------|--------|---------|-----------|---------|
| 5          | 4          | 5          | 5          | 5          | 12     | 32      | Yes       | 80      |
| 2          | 1          | 3          | 4          | 4          | 27     | 41      | Yes       | 80      |
| 4          | 4          | 4          | 3          | 4          | 16     | 57      | Yes       | 50      |
| 1          | 1          | 3          | 4          | 5          | 18     | 59      | Yes       | 80      |
| 1          | 4          | 3          | 5          | 5          | 19     | 59      | Yes       | .       |
| 4          | 1          | 2          | 3          | 5          | 21     | 43      | Yes       | 60      |
| 3          | 2          | 5          | 4          | 5          | 21     | 41      | Yes       | 30      |
| 3          | 1          | 1          | 5          | 5          | 23     | .       | Yes       | 60      |
| 2          | 2          | 5          | 5          | 5          | 16     | .       | Yes       | 60      |
| 5          | 3          | 5          | 5          | 5          | 13     | 59      | Yes       | 60      |
| 4          | 1          | 3          | 4          | 5          | 20     | 51      | Yes       | 80      |
| 1          | 2          | 2          | 3          | 3          | 36     | 39      | Yes       | 0       |
| 3          | 1          | 4          | 5          | 4          | 18     | 47      | Yes       | 50      |
| 4          | 3          | 4          | 5          | 5          | 18     | 55      | Yes       | 60      |
| 3          | 3          | 5          | 4          | 5          | 21     | 39      | Yes       | .       |
| 5          | 2          | 5          | 5          | 5          | 14     | 61      | Yes       | .       |
| 3          | 2          | 5          | 3          | 4          | 22     | 20      | Yes       | .       |
| .          | .          | .          | .          | .          | .      | .       | Yes       | .       |
| 3          | 1          | 4          | 4          | 4          | 19     | 56      | Yes       | .       |
| 1          | 1          | 4          | 5          | 4          | 25     | 63      | Yes       | 20      |
| .          | .          | .          | .          | .          | .      | 33      | Yes       | 60      |
| 3          | 3          | 3          | 3          | 4          | 20     | 47      | Yes       | .       |
| 3          | 1          | 5          | 2          | 5          | 24     | 39      | Yes       | .       |
| 1          | 5          | 1          | 5          | 1          | 37     | .       | Yes       | .       |
| 3          | 4          | 5          | 5          | 5          | 16     | 20      | Yes       | .       |
| 5          | 4          | 5          | 5          | 5          | 17     | 46      | Yes       | .       |
| 3          | 3          | 5          | 3          | 5          | 17     | 19      | Yes       | .       |
| 4          | 5          | 5          | 5          | 5          | 17     | 14      | Yes       | .       |
| 5          | 3          | 5          | 5          | 5          | 15     | 57      | Yes       | .       |
| 3          | 3          | 2          | 3          | 3          | 29     | 47      | No        | .       |
| 1          | 1          | 3          | 3          | 3          | 32     | 20      | Yes       | .       |
| 5          | 2          | 5          | 5          | 5          | 15     | 38      | Yes       | .       |
| 2          | 1          | 3          | 4          | 4          | 24     | 27      | Yes       | .       |
| 5          | 3          | 5          | 5          | 5          | 14     | 44      | Yes       | .       |
| 4          | 3          | 5          | 4          | 5          | 17     | 64      | No        | .       |
| 3          | 3          | 4          | 5          | 5          | 20     | 51      | Yes       | 60      |
| 4          | 1          | 5          | 4          | 4          | 19     | 55      | Yes       | .       |
| 2          | 4          | 3          | 2          | 4          | 29     | 22      | Yes       | .       |
| 5          | 4          | 4          | 3          | 5          | 18     | 53      | Yes       | .       |
| 3          | 3          | 3          | 3          | 4          | 24     | 48      | Yes       | 40      |
| 3          | 1          | 4          | 4          | 2          | 29     | 44      | Yes       | 0       |
| 4          | 3          | 3          | 3          | 4          | 20     | 41      | Yes       | .       |
| 4          | 3          | 4          | 3          | 4          | 20     | 17      | Yes       | .       |
| 1          | 5          | 2          | 5          | 1          | 31     | 7       | Yes       | .       |
| 2          | 3          | 3          | 3          | 3          | 31     | 28      | Yes       | 20      |
| 2          | 4          | 2          | 4          | 5          | 22     | 39      | Yes       | .       |
| 1          | 5          | 5          | 5          | 4          | 20     | 58      | Yes       | .       |
| 3          | 2          | 3          | 3          | 4          | 29     | 54      | Yes       | .       |

|   |   |   |   |   |    |    |     |    |
|---|---|---|---|---|----|----|-----|----|
| 5 | 4 | 5 | 4 | 5 | 11 | 57 | Yes | .  |
| 1 | 3 | 5 | 5 | 5 | 23 | 26 | Yes | .  |
| 1 | 3 | 4 | 4 | 4 | 28 | 46 | Yes | 70 |
| 3 | 3 | 5 | 5 | 5 | 21 | 25 | Yes | .  |
| 5 | 2 | 4 | 4 | 5 | 16 | 63 | Yes | .  |
| 1 | 5 | 1 | 3 | 5 | 28 | 21 | Yes | 10 |
| 2 | 1 | 3 | 3 | 5 | 24 | 49 | Yes | 20 |
| 1 | 2 | 3 | 4 | 4 | 25 | 29 | Yes | .  |
| 3 | 4 | 4 | 3 | 5 | 18 | 60 | Yes | .  |
| 1 | 1 | 1 | 3 | 2 | 37 | 43 | Yes | .  |
| 3 | 1 | 5 | 1 | 5 | 23 | 40 | Yes | .  |
| 2 | 2 | 2 | 5 | 4 | 25 | 25 | Yes | 0  |
| 1 | 4 | 2 | 3 | 5 | 30 | 46 | Yes | 60 |
| 1 | 1 | 3 | 5 | 5 | 28 | .  | Yes | 60 |
| 3 | 3 | 5 | 5 | 5 | 21 | 57 | Yes | 50 |
| 5 | 4 | 3 | 1 | 3 | 24 | 46 | Yes | 40 |
| 4 | 5 | 1 | 5 | 2 | 23 | 54 | Yes | .  |
| 5 | 3 | 3 | 4 | 4 | 18 | 65 | Yes | .  |
| 3 | 3 | 3 | 4 | 4 | 30 | 27 | Yes | 30 |
| 5 | 1 | 3 | 4 | 4 | 22 | 24 | Yes | 30 |
| 5 | 1 | 5 | 5 | 5 | 13 | 48 | Yes | 40 |
| 2 | 1 | 2 | 2 | 3 | 34 | 20 | Yes | 40 |
| 1 | 4 | 4 | 3 | 5 | 23 | 44 | Yes | 20 |
| 1 | 1 | 5 | 3 | 3 | 25 | 51 | Yes | 10 |
| 1 | 2 | 4 | 5 | 5 | 21 | 27 | Yes | 40 |
| 1 | 2 | 5 | 3 | 2 | 36 | 4  | Yes | 30 |
| 1 | 4 | 3 | 3 | 4 | 24 | 30 | Yes | 20 |
| 4 | 3 | 5 | 3 | 4 | 20 | 48 | Yes | 30 |
| 1 | 4 | 5 | 5 | 5 | 19 | 26 | Yes | 60 |
| 1 | 3 | 1 | 3 | 3 | 34 | 22 | Yes | 20 |
| 3 | 3 | 4 | 3 | 4 | 18 | 64 | Yes | 20 |
| 5 | 3 | 5 | 5 | 5 | 12 | 65 | Yes | 50 |
| 5 | 3 | 3 | 3 | 3 | 21 | 40 | Yes | 40 |
| 1 | 3 | 3 | 5 | 2 | 28 | 35 | Yes | 50 |
| 3 | 4 | 3 | 3 | 4 | 29 | 41 | Yes | 30 |
| 2 | 3 | 4 | 2 | 4 | 26 | 21 | Yes | 20 |
| 2 | 4 | 5 | 4 | 3 | 23 | 26 | Yes | 60 |
| 5 | 3 | 4 | 5 | 5 | 17 | 54 | Yes | 10 |
| 3 | 3 | 5 | 3 | 5 | 21 | 26 | Yes | 60 |
| 4 | 5 | 4 | 5 | 5 | 20 | 54 | Yes | 50 |
| 4 | 4 | 4 | 5 | 5 | 13 | 58 | Yes | 50 |
| 4 | 4 | 5 | 5 | 2 | 20 | 63 | Yes | 30 |
| 3 | 4 | 4 | 4 | 5 | 19 | 51 | Yes | 40 |
| 1 | 1 | 5 | 1 | 5 | 31 | 18 | Yes | 50 |
| 3 | 3 | 3 | 3 | 1 | 31 | 38 | Yes | 30 |
| 3 | 1 | 3 | 4 | 4 | 23 | 44 | Yes | 30 |
| 4 | 4 | 3 | 4 | 4 | 21 | 44 | Yes | 60 |
| 4 | 3 | 4 | 4 | 5 | 19 | .  | Yes | 10 |
| 4 | 5 | 4 | 3 | 4 | 20 | 46 | Yes | 50 |
| 3 | 4 | 3 | 2 | 4 | 25 | 37 | Yes | 40 |



|   |   |   |   |   |    |    |     |     |
|---|---|---|---|---|----|----|-----|-----|
| 3 | 1 | 1 | 3 | 4 | 25 | 36 | Yes | 50  |
| 2 | 2 | 4 | 4 | 3 | 22 | .  | Yes | 30  |
| 3 | 5 | 1 | 1 | 1 | 29 | 32 | Yes | 50  |
| 3 | 2 | 2 | 3 | 2 | 31 | 43 | Yes | 20  |
| 3 | 3 | 5 | 3 | 3 | 31 | 30 | Yes | 30  |
| 4 | 3 | 5 | 5 | 5 | 14 | 60 | Yes | 40  |
| 1 | 1 | 5 | 5 | 2 | 26 | 37 | Yes | 20  |
| 4 | 3 | 4 | 5 | 5 | 18 | 51 | Yes | 40  |
| 3 | 2 | 2 | 3 | 5 | 18 | 44 | Yes | .   |
| 5 | 5 | 5 | 5 | 5 | 13 | .  | No  | .   |
| 3 | 3 | 3 | 5 | 5 | 22 | 29 | Yes | .   |
| . | . | . | 2 | . | .  | .  | No  | .   |
| 3 | 3 | 5 | 3 | 3 | 18 | 53 | Yes | 30  |
| 3 | 5 | 5 | 5 | 5 | 14 | 53 | Yes | 100 |
| 3 | 3 | 4 | 3 | 3 | 21 | 51 | Yes | .   |
| 1 | 1 | 5 | 3 | 3 | 20 | 32 | No  | .   |
| 2 | 2 | 4 | 4 | 3 | 26 | 49 | Yes | 70  |
| 1 | 1 | 1 | 3 | 1 | 35 | 0  | Yes | 10  |
| 2 | 2 | 2 | 3 | 3 | 30 | 46 | Yes | .   |
| 4 | 5 | 3 | 4 | 4 | 22 | 41 | Yes | .   |
| 2 | 4 | 5 | 5 | 4 | 18 | 48 | Yes | .   |
| 5 | 2 | 4 | 3 | 4 | 21 | 56 | Yes | 30  |
| 3 | 3 | 3 | 2 | 4 | 33 | 12 | Yes | 50  |
| 3 | 1 | 3 | 5 | 3 | 24 | 26 | No  | .   |
| 5 | 1 | 5 | 5 | 5 | 17 | 60 | Yes | .   |
| 1 | 2 | 4 | 1 | 2 | 29 | 17 | Yes | .   |
| 3 | 4 | 3 | 5 | 4 | 18 | 66 | Yes | .   |
| 5 | 5 | 5 | 5 | 4 | 15 | 60 | Yes | 60  |
| 3 | 3 | 2 | 2 | 3 | 31 | 31 | No  | .   |
| 1 | 3 | 2 | 1 | 2 | 35 | 12 | Yes | .   |

| d7_bbq_coll | d7_bbq_comp | d7_bbq_nfill | d7_bbq_q1 | d7_bbq_q2 | d7_bbq_q3 | d7_bbq_q4 | d7_bbq_q5 |
|-------------|-------------|--------------|-----------|-----------|-----------|-----------|-----------|
| Yes         | Yes         | 1            | 5         | 5         | 5         | 2         | 3         |
| Yes         | Yes         | 0            | 1         | 4         | 1         | 1         | 5         |
| Yes         | Yes         | 0            | 4         | 5         | 5         | 4         | 5         |
| Yes         | Yes         | 0            | 3         | 4         | 4         | 4         | 5         |
| Yes         | Yes         | 0            | 3         | 5         | 4         | 2         | 2         |
| Yes         | Yes         | 0            | 3         | 5         | 3         | 4         | 5         |
| Yes         | Yes         | 0            | 1         | 3         | 3         | 1         | 5         |
| Yes         | Yes         | 0            | 5         | 3         | 3         | 3         | 5         |
| Yes         | Yes         | 0            | 2         | 4         | 5         | 4         | 3         |
| Yes         | Yes         | 0            | 3         | 5         | 4         | 3         | 4         |
| Yes         | Yes         | 0            | 3         | 2         | 5         | 4         | 5         |
| Yes         | Yes         | 0            | 1         | 4         | 2         | 1         | 4         |
| Yes         | Yes         | 0            | 5         | 4         | 5         | 5         | 3         |
| Yes         | Yes         | 0            | 3         | 5         | 5         | 3         | 3         |
| Yes         | Yes         | 0            | 2         | 3         | 4         | 2         | 3         |
| Yes         | Yes         | 0            | 3         | 5         | 5         | 2         | 5         |
| Yes         | Yes         | 0            | 3         | 3         | 3         | 1         | 5         |
| Yes         | Yes         | 0            | 3         | 5         | 5         | 3         | 3         |
| Yes         | Yes         | 0            | 1         | 1         | 5         | 1         | 5         |
| Yes         | Yes         | 0            | 4         | 3         | 4         | 3         | 5         |
| Yes         | Yes         | 0            | 3         | 3         | 2         | 3         | 2         |
| Yes         | Yes         | 0            | 4         | 4         | 5         | 4         | 3         |
| Yes         | Yes         | 0            | 2         | 3         | 2         | 2         | 5         |
| Yes         | Yes         | 0            | 1         | 5         | 1         | 1         | 5         |
| Yes         | Yes         | 0            | 3         | 4         | 5         | 3         | 4         |
| Yes         | Yes         | 0            | 5         | 5         | 5         | 1         | 1         |
| Yes         | Yes         | 0            | 3         | 4         | 3         | 2         | 5         |
| Yes         | Yes         | 0            | 4         | 5         | 3         | 3         | 5         |
| Yes         | Yes         | 0            | 3         | 5         | 5         | 3         | 4         |
|             |             | 14           | .         | .         | .         | .         | .         |
| Yes         | Yes         | 0            | 1         | 3         | 2         | 3         | 3         |
| Yes         | Yes         | 0            | 5         | 5         | 5         | 5         | 5         |
| Yes         | Yes         | 0            | 4         | 5         | 3         | 5         | 4         |
| Yes         | Yes         | 0            | 3         | 5         | 5         | 3         | 4         |
|             |             | 14           | .         | .         | .         | .         | .         |
| Yes         | Yes         | 0            | 3         | 5         | 3         | 1         | 3         |
| Yes         | Yes         | 0            | 3         | 3         | 5         | 3         | 4         |
| Yes         | Yes         | 0            | 2         | 4         | 4         | 2         | 5         |
| Yes         | Yes         | 0            | 4         | 4         | 5         | 4         | 3         |
| Yes         | Yes         | 0            | 3         | 3         | 3         | 4         | 3         |
| Yes         | Yes         | 0            | 1         | 3         | 2         | 1         | 5         |
| Yes         | Yes         | 0            | 3         | 5         | 3         | 3         | 4         |
| Yes         | Yes         | 0            | 3         | 1         | 4         | 3         | 5         |
| Yes         | Yes         | 0            | 4         | 1         | 2         | 2         | 5         |
| Yes         | Yes         | 0            | 1         | 2         | 3         | 1         | 5         |
| Yes         | Yes         | 0            | 3         | 5         | 5         | 3         | 5         |
| Yes         | Yes         | 0            | 4         | 2         | 2         | 4         | 3         |
| Yes         | Yes         | 0            | 1         | 3         | 2         | 4         | 4         |

|     |     |   |   |   |   |   |   |
|-----|-----|---|---|---|---|---|---|
| Yes | Yes | 0 | 5 | 4 | 5 | 4 | 4 |
| Yes | Yes | 0 | 2 | 3 | 2 | 2 | 5 |
| Yes | Yes | 0 | 4 | 4 | 4 | 1 | 4 |
| Yes | Yes | 0 | 1 | 3 | 5 | 2 | 4 |
| Yes | Yes | 0 | 4 | 4 | 5 | 4 | 4 |
| Yes | Yes | 0 | 1 | 3 | 5 | 3 | 4 |
| Yes | Yes | 0 | 4 | 3 | 5 | 3 | 5 |
| Yes | Yes | 0 | 3 | 2 | 2 | 2 | 3 |
| Yes | Yes | 0 | 2 | 4 | 4 | 2 | 5 |
| Yes | Yes | 0 | 1 | 1 | 5 | 5 | 1 |
| Yes | Yes | 0 | 1 | 2 | 5 | 2 | 5 |
| Yes | Yes | 0 | 3 | 2 | 2 | 4 | 5 |
| Yes | Yes | 0 | 3 | 4 | 3 | 3 | 4 |
| Yes | Yes | 0 | 3 | 1 | 3 | 1 | 5 |
| Yes | Yes | 0 | 1 | 5 | 1 | 1 | 5 |
| Yes | Yes | 0 | 1 | 5 | 4 | 1 | 5 |
| Yes | Yes | 0 | 3 | 5 | 4 | 3 | 5 |
| Yes | Yes | 0 | 4 | 4 | 4 | 3 | 3 |
| Yes | Yes | 0 | 1 | 3 | 3 | 3 | 3 |
| Yes | Yes | 0 | 3 | 5 | 3 | 5 | 5 |
| Yes | Yes | 0 | 3 | 4 | 4 | 2 | 4 |
| Yes | Yes | 0 | 1 | 4 | 2 | 1 | 5 |
| Yes | Yes | 0 | 1 | 4 | 4 | 3 | 5 |
| Yes | Yes | 0 | 1 | 5 | 5 | 1 | 5 |
| Yes | Yes | 0 | 3 | 4 | 3 | 3 | 5 |
| Yes | Yes | 0 | 1 | 1 | 2 | 1 | 5 |
| Yes | Yes | 0 | 3 | 4 | 5 | 3 | 5 |
| Yes | Yes | 0 | 3 | 4 | 4 | 3 | 4 |
| Yes | Yes | 0 | 5 | 4 | 5 | 5 | 4 |
| Yes | Yes | 0 | 2 | 1 | 3 | 2 | 4 |
| Yes | Yes | 0 | 3 | 4 | 3 | 3 | 4 |
| Yes | Yes | 0 | 5 | 5 | 5 | 5 | 3 |
| Yes | Yes | 0 | 3 | 5 | 5 | 3 | 5 |
| Yes | Yes | 0 | 3 | 3 | 3 | 2 | 4 |
| Yes | Yes | 0 | 1 | 3 | 3 | 1 | 3 |
| Yes | Yes | 0 | 4 | 2 | 4 | 3 | 4 |
| Yes | Yes | 0 | 2 | 4 | 4 | 1 | 3 |
| Yes | Yes | 0 | 3 | 5 | 4 | 3 | 5 |
| Yes | Yes | 0 | 3 | 3 | 3 | 2 | 5 |
| Yes | Yes | 0 | 4 | 5 | 5 | 3 | 4 |
| Yes | Yes | 0 | 2 | 2 | 2 | 2 | 3 |
| Yes | Yes | 0 | 3 | 3 | 5 | 2 | 5 |
| Yes | Yes | 0 | 3 | 5 | 5 | 3 | 4 |
| Yes | Yes | 0 | 1 | 1 | 3 | 1 | 5 |
| Yes | Yes | 0 | 2 | 5 | 2 | 2 | 5 |
| Yes | Yes | 0 | 3 | 3 | 1 | 3 | 2 |
| Yes | Yes | 0 | 3 | 4 | 5 | 3 | 3 |
| Yes | Yes | 0 | 4 | 5 | 5 | 3 | 4 |
| Yes | Yes | 0 | 5 | 5 | 5 | 4 | 3 |
| Yes | Yes | 0 | 3 | 1 | 3 | 2 | 5 |

|     |     |    |   |   |   |   |   |
|-----|-----|----|---|---|---|---|---|
| Yes | Yes | 0  | 4 | 5 | 5 | 4 | 3 |
| Yes | Yes | 0  | 4 | 5 | 4 | 4 | 4 |
| Yes | Yes | 0  | 3 | 3 | 3 | 3 | 3 |
| Yes | Yes | 0  | 2 | 3 | 2 | 2 | 5 |
| Yes | Yes | 0  | 1 | 2 | 1 | 1 | 5 |
| Yes | Yes | 0  | 4 | 4 | 5 | 3 | 4 |
| Yes | Yes | 0  | 1 | 5 | 3 | 1 | 5 |
| Yes | Yes | 0  | 3 | 4 | 4 | 2 | 5 |
| Yes | Yes | 0  | 3 | 3 | 5 | 2 | 3 |
|     |     | 14 | . | . | . | . | . |
| Yes | Yes | 0  | 4 | 4 | 4 | 4 | 5 |
|     |     | 14 | . | . | . | . | . |
| Yes | Yes | 0  | 3 | 5 | 3 | 3 | 5 |
| Yes | Yes | 1  | 3 | 5 | 5 | 3 | 1 |
| Yes | Yes | 0  | 3 | 1 | 4 | 3 | 2 |
|     |     | 14 | . | . | . | . | . |
| Yes | Yes | 0  | 2 | 3 | 5 | 2 | 5 |
| Yes | Yes | 0  | 3 | 5 | 5 | 1 | 5 |
| Yes | Yes | 0  | 2 | 4 | 4 | 2 | 4 |
| Yes | Yes | 0  | 3 | 3 | 4 | 2 | 5 |
| Yes | Yes | 0  | 1 | 5 | 3 | 2 | 5 |
| Yes | Yes | 0  | 4 | 4 | 3 | 3 | 4 |
| Yes | Yes | 0  | 5 | 2 | 3 | 3 | 5 |
|     |     | 14 | . | . | . | . | . |
| Yes | Yes | 0  | 1 | 5 | 5 | 1 | 5 |
| Yes | Yes | 0  | 2 | 4 | 3 | 2 | 4 |
| Yes | Yes | 0  | 1 | 3 | 4 | 1 | 2 |
| Yes | Yes | 0  | 2 | 3 | 4 | 3 | 2 |
|     |     | 14 | . | . | . | . | . |
| Yes | Yes | 0  | 3 | 1 | 2 | 1 | 4 |

| d7_bbq_q6 | d7_bbq_q7 | d7_bbq_q8 | d7_bbq_q9 | d7_bbq_q10 | d7_bbq_q11 | d7_bbq_q12 | d7_bbq_q13 |
|-----------|-----------|-----------|-----------|------------|------------|------------|------------|
| 5         | 1         | 1         | .         | 5          | 4          | 5          | 5          |
| 5         | 1         | 1         | 4         | 1          | 1          | 1          | 3          |
| 5         | 4         | 5         | 4         | 3          | 1          | 3          | 3          |
| 5         | 1         | 3         | 3         | 3          | 3          | 3          | 3          |
| 4         | 2         | 1         | 1         | 4          | 3          | 2          | 3          |
| 5         | 1         | 1         | 1         | 1          | 2          | 3          | 3          |
| 5         | 4         | 2         | 3         | 3          | 2          | 5          | 3          |
| 5         | 5         | 2         | 1         | 3          | 3          | 5          | 5          |
| 5         | 4         | 4         | 3         | 5          | 2          | 4          | 5          |
| 4         | 2         | 1         | 3         | 4          | 3          | 3          | 2          |
| 5         | 3         | 1         | 2         | 1          | 3          | 4          | 5          |
| 4         | 1         | 2         | 3         | 3          | 2          | 3          | 3          |
| 5         | 1         | 3         | 2         | 3          | 3          | 5          | 4          |
| 4         | 3         | 4         | 4         | 5          | 5          | 4          | 5          |
| 4         | 2         | 1         | 3         | 3          | 3          | 5          | 4          |
| 5         | 2         | 2         | 1         | 3          | 2          | 5          | 5          |
| 5         | 2         | 1         | 3         | 3          | 2          | 2          | 2          |
| 3         | 3         | 1         | 3         | 3          | 3          | 3          | 3          |
| 5         | 1         | 1         | 1         | 5          | 5          | 5          | 5          |
| 2         | 1         | 1         | 1         | 2          | 1          | 4          | 5          |
| 4         | 3         | 1         | 2         | 1          | 4          | 3          | 2          |
| 5         | 1         | 4         | 4         | 3          | 3          | 4          | 4          |
| 5         | 1         | 2         | 3         | 4          | 1          | 3          | 1          |
| 5         | 1         | 1         | 3         | 1          | 1          | 5          | 5          |
| 5         | 3         | 1         | 3         | 4          | 4          | 4          | 5          |
| 5         | 5         | 1         | 5         | 1          | 5          | 5          | 5          |
| 5         | 3         | 2         | 3         | 4          | 3          | 3          | 2          |
| 5         | 1         | 1         | 3         | 4          | 3          | 3          | 4          |
| 5         | 1         | 3         | 3         | 3          | 2          | 3          | 5          |
| .         | .         | .         | .         | .          | .          | .          | .          |
| 4         | 2         | 1         | 3         | 2          | 3          | 3          | 3          |
| 5         | 1         | 1         | 1         | 4          | 1          | 4          | 4          |
| 3         | 1         | 3         | 3         | 2          | 3          | 3          | 3          |
| 5         | 3         | 3         | 1         | 4          | 1          | 5          | 4          |
| .         | .         | .         | .         | .          | .          | .          | .          |
| 5         | 1         | 1         | 3         | 3          | 1          | 5          | 3          |
| 5         | 2         | 1         | 3         | 3          | 1          | 5          | 3          |
| 5         | 3         | 1         | 2         | 3          | 2          | 3          | 2          |
| 5         | 1         | 1         | 1         | 4          | 5          | 4          | 3          |
| 3         | 3         | 3         | 3         | 3          | 3          | 3          | 3          |
| 1         | 2         | 1         | 2         | 2          | 1          | 4          | 4          |
| 4         | 3         | 3         | 3         | 4          | 3          | 4          | 4          |
| 3         | 1         | 1         | 4         | 4          | 3          | 4          | 4          |
| 3         | 1         | 1         | 3         | 1          | 4          | 4          | 5          |
| 5         | 2         | 1         | 3         | 3          | 4          | 4          | 3          |
| 5         | 3         | 4         | 3         | 3          | 5          | 2          | 4          |
| 2         | 1         | 1         | 1         | 1          | 3          | 5          | 1          |
| 2         | 1         | 1         | 2         | 3          | 3          | 4          | 4          |

|   |   |   |   |   |   |   |   |
|---|---|---|---|---|---|---|---|
| 4 | 2 | 5 | 3 | 5 | 4 | 5 | 4 |
| 4 | 4 | 3 | 2 | 1 | 3 | 2 | 5 |
| 4 | 1 | 1 | 3 | 3 | 2 | 4 | 3 |
| 5 | 1 | 1 | 3 | 4 | 1 | 5 | 5 |
| 5 | 1 | 1 | 5 | 5 | 2 | 4 | 4 |
| 4 | 5 | 2 | 3 | 3 | 3 | 3 | 3 |
| 5 | 1 | 1 | 3 | 1 | 1 | 3 | 3 |
| 1 | 1 | 2 | 2 | 1 | 1 | 3 | 5 |
| 5 | 2 | 1 | 1 | 4 | 2 | 2 | 2 |
| 1 | 1 | 1 | 1 | 1 | 1 | 4 | 1 |
| 4 | 1 | 1 | 3 | 4 | 1 | 3 | 1 |
| 3 | 1 | 4 | 3 | 2 | 4 | 2 | 4 |
| 5 | 2 | 1 | 2 | 3 | 2 | 4 | 4 |
| 1 | 1 | 1 | 1 | 1 | 3 | 3 | 4 |
| 5 | 3 | 1 | 1 | 5 | 3 | 5 | 5 |
| 3 | 1 | 1 | 3 | 5 | 2 | 4 | 2 |
| 4 | 1 | 1 | 3 | 3 | 4 | 1 | 4 |
| 4 | 3 | 1 | 1 | 4 | 3 | 4 | 4 |
| 4 | 3 | 3 | 3 | 2 | 3 | 4 | 3 |
| 4 | 4 | 1 | 3 | 5 | 4 | 5 | 5 |
| 4 | 2 | 2 | 4 | 4 | 2 | 4 | 4 |
| 2 | 1 | 1 | 4 | 2 | 1 | 3 | 2 |
| 4 | 1 | 1 | 3 | 3 | 4 | 5 | 3 |
| 5 | 3 | 1 | 5 | 3 | 1 | 5 | 3 |
| 5 | 3 | 2 | 2 | 3 | 2 | 3 | 4 |
| 2 | 1 | 1 | 3 | 1 | 1 | 4 | 1 |
| 5 | 2 | 3 | 3 | 2 | 4 | 4 | 4 |
| 4 | 5 | 2 | 2 | 4 | 3 | 4 | 4 |
| 5 | 2 | 1 | 1 | 5 | 2 | 5 | 5 |
| 5 | 1 | 1 | 3 | 1 | 4 | 1 | 4 |
| 5 | 5 | 3 | 4 | 4 | 3 | 4 | 4 |
| 5 | 2 | 4 | 3 | 5 | 4 | 5 | 5 |
| 5 | 2 | 2 | 3 | 4 | 4 | 3 | 3 |
| 3 | 2 | 1 | 2 | 1 | 2 | 5 | 5 |
| 2 | 3 | 1 | 3 | 2 | 3 | 4 | 4 |
| 4 | 2 | 1 | 3 | 1 | 3 | 3 | 2 |
| 5 | 1 | 1 | 2 | 1 | 4 | 4 | 3 |
| 5 | 2 | 2 | 4 | 4 | 3 | 4 | 5 |
| 2 | 1 | 1 | 2 | 2 | 3 | 3 | 3 |
| 5 | 2 | 5 | 1 | 5 | 4 | 5 | 5 |
| 2 | 3 | 3 | 3 | 2 | 2 | 2 | 2 |
| 5 | 2 | 2 | 2 | 5 | 4 | 5 | 3 |
| 5 | 1 | 3 | 3 | 4 | 4 | 4 | 5 |
| 1 | 1 | 1 | 3 | 1 | 1 | 3 | 1 |
| 5 | 4 | 1 | 3 | 3 | 3 | 4 | 3 |
| 2 | 3 | 3 | 2 | 3 | 5 | 2 | 3 |
| 5 | 3 | 2 | 3 | 4 | 2 | 4 | 3 |
| 5 | 3 | 3 | 4 | 5 | 3 | 5 | 5 |
| 5 | 2 | 1 | 2 | 5 | 5 | 5 | 3 |
| 4 | 2 | 2 | 3 | 2 | 3 | 2 | 2 |

|   |   |   |   |   |   |   |   |
|---|---|---|---|---|---|---|---|
| 5 | 3 | 1 | 1 | 1 | 3 | 3 | 2 |
| 4 | 3 | 2 | 3 | 4 | 4 | 4 | 3 |
| 5 | 3 | 1 | 3 | 5 | 3 | 5 | 5 |
| 5 | 3 | 2 | 4 | 3 | 4 | 4 | 2 |
| 2 | 3 | 1 | 1 | 1 | 3 | 2 | 2 |
| 5 | 5 | 3 | 1 | 4 | 4 | 5 | 5 |
| 4 | 1 | 1 | 4 | 1 | 1 | 5 | 5 |
| 3 | 1 | 1 | 2 | 3 | 2 | 3 | 4 |
| 5 | 1 | 1 | 3 | 4 | 3 | 4 | 4 |
| . | . | . | . | . | . | . | . |
| 5 | 1 | 1 | 1 | 3 | 3 | 4 | 5 |
| . | . | . | . | . | . | . | . |
| 5 | 3 | 1 | 3 | 5 | 3 | 5 | 1 |
| 5 | . | 3 | 3 | 3 | 5 | 5 | 5 |
| 4 | 3 | 3 | 2 | 3 | 4 | 5 | 3 |
| . | . | . | . | . | . | . | . |
| 3 | 1 | 1 | 3 | 2 | 3 | 4 | 3 |
| 4 | 3 | 1 | 3 | 5 | 2 | 5 | 2 |
| 5 | 1 | 1 | 1 | 2 | 2 | 4 | 3 |
| 5 | 3 | 2 | 1 | 5 | 3 | 4 | 4 |
| 3 | 2 | 3 | 4 | 4 | 2 | 5 | 5 |
| 5 | 1 | 1 | 4 | 4 | 3 | 4 | 4 |
| 4 | 1 | 1 | 3 | 3 | 2 | 5 | 3 |
| . | . | . | . | . | . | . | . |
| 5 | 1 | 3 | 3 | 5 | 1 | 5 | 5 |
| 5 | 1 | 1 | 3 | 5 | 3 | 3 | 3 |
| 2 | 1 | 1 | 3 | 1 | 1 | 2 | 4 |
| 4 | 2 | 1 | 4 | 3 | 2 | 2 | 2 |
| . | . | . | . | . | . | . | . |
| 3 | 1 | 1 | 4 | 1 | 3 | 1 | 2 |

| d7_bbq_q14 | d7_bbq | d7_fabq_phys | d7_fabq_work | d7_fabq | d7_quebec | d7_tampa | d7_had_dep |
|------------|--------|--------------|--------------|---------|-----------|----------|------------|
| 5          | 13     | 21           | 31           | 52      | 81        | 63       | 13         |
| 3          | 34     | 8            | 27           | 35      | 82        | 34       | 3          |
| 5          | 16     | 22           | 42           | 64      | 28        | 52       | 7          |
| 4          | 22     | 15           | 34           | 49      | 71        | 51       | 10         |
| 4          | 24     | 18           | 37           | 55      | 51        | 48       | 4          |
| 4          | 26     | 17           | 14           | 31      | 47        | 47       | 9          |
| 4          | 25     | 5            | 24           | 29      | 54        | 39       | 12         |
| 5          | 18     | 16           | 13           | 29      | 71        | 54       | 12         |
| 5          | 15     | 16           | .            | .       | 48        | 57       | 10         |
| 4          | 24     | 4            | 35           | 39      | 34        | 41       | 10         |
| 5          | 23     | 19           | 38           | 57      | 41        | 53       | 6          |
| 3          | 29     | 15           | 31           | 46      | 23        | 38       | 6          |
| 4          | 16     | 22           | 34           | 56      | 30        | 45       | 7          |
| 5          | 14     | 12           | 37           | 49      | 15        | 48       | 4          |
| 5          | 23     | 14           | 22           | 36      | 40        | 46       | 7          |
| 5          | 16     | 17           | 42           | 59      | 67        | .        | 8          |
| 3          | 29     | 8            | 14           | 22      | 46        | 35       | 5          |
| 3          | 25     | 24           | 42           | 66      | 37        | 51       | 4          |
| 5          | 21     | 17           | 36           | 53      | 46        | .        | 13         |
| 4          | 25     | 8            | 41           | 49      | 62        | 37       | 12         |
| 5          | 30     | 18           | 24           | 42      | 63        | .        | 10         |
| 5          | 16     | 19           | 8            | 27      | 62        | 48       | 11         |
| 4          | 28     | 10           | 26           | 36      | 53        | 44       | 14         |
| 5          | 25     | 24           | 39           | 63      | 33        | 50       | .          |
| 5          | 18     | 20           | 7            | 27      | 34        | 46       | 6          |
| 5          | 17     | 18           | 42           | 60      | 37        | 52       | 9          |
| 4          | 24     | 11           | 16           | 27      | 25        | 45       | 3          |
| 5          | 20     | 17           | 17           | 34      | 34        | 50       | 8          |
| 5          | 17     | 17           | 33           | 50      | 56        | 48       | 9          |
| .          | .      | .            | .            | .       | .         | .        | .          |
| 3          | 32     | 12           | 0            | 12      | 37        | 38       | 5          |
| 3          | 18     | 7            | 32           | 39      | 15        | 27       | 6          |
| 3          | 25     | 12           | 14           | 26      | 19        | 32       | 3          |
| 5          | 15     | 15           | 16           | 31      | 44        | 49       | 18         |
| .          | .      | .            | .            | .       | .         | .        | .          |
| 5          | 21     | 21           | 30           | 51      | 69        | 46       | 11         |
| 5          | 21     | 18           | 35           | 53      | 46        | 43       | 9          |
| 4          | 26     | 14           | 9            | 23      | 42        | 43       | 9          |
| 5          | 19     | 18           | 34           | 52      | 36        | 50       | 3          |
| 3          | 27     | 17           | 42           | 59      | 33        | 42       | 12         |
| 3          | 33     | 12           | 39           | 51      | 26        | 37       | 3          |
| 4          | 20     | 17           | 24           | 41      | 37        | 46       | 11         |
| 3          | 27     | 11           | 9            | 20      | 12        | 41       | 5          |
| 1          | 32     | 4            | 0            | 4       | 21.0526   | 30       | 5          |
| 3          | 29     | 13           | 13           | 26      | 3         | 45       | 5          |
| 5          | 18     | 13           | 25           | 38      | 45        | 37       | 8          |
| 3          | 33     | 13           | 24           | 37      | 31        | .        | 5          |
| 3          | 31     | 13           | 41           | 54      | 18        | 33       | 3          |



|   |    |    |    |    |         |    |    |
|---|----|----|----|----|---------|----|----|
| 4 | 13 | 21 | 40 | 61 | 41      | 60 | 5  |
| 4 | 28 | 3  | 4  | 7  | 7       | 34 | 2  |
| 4 | 23 | 19 | 30 | 49 | 72      | 40 | 6  |
| 5 | 20 | 20 | 10 | 30 | 19      | 51 | 2  |
| 4 | 18 | 20 | 42 | 62 | 42      | 49 | 12 |
| 3 | 27 | 16 | 9  | 25 | 42      | 48 | 4  |
| 3 | 26 | 15 | 11 | 26 | 25      | 36 | 7  |
| 4 | 31 | 10 | 12 | 22 | 7.3684  | 46 | 8  |
| 5 | 25 | 7  | 40 | 47 | 50      | 40 | 8  |
| 1 | 38 | 12 | 8  | 20 | 25      | 37 | 4  |
| 4 | 29 | 6  | 20 | 26 | 21      | 36 | 10 |
| 3 | 29 | 13 | 21 | 34 | 12      | 43 | .  |
| 3 | 24 | 12 | 28 | 40 | 27      | 41 | 10 |
| 3 | 34 | 2  | 6  | 8  | 36      | 32 | 5  |
| 3 | 23 | 19 | 39 | 58 | 55      | 52 | 12 |
| 4 | 25 | 3  | 32 | 35 | 28      | 37 | 6  |
| 2 | 27 | 17 | 29 | 46 | 32      | 38 | 8  |
| 4 | 21 | 14 | 36 | 50 | 34      | 46 | 7  |
| 4 | 27 | 13 | 14 | 27 | 24      | 44 | 5  |
| 5 | 18 | 14 | 38 | 52 | 36      | 46 | 11 |
| 4 | 21 | 19 | 29 | 48 | 27      | 46 | 7  |
| 3 | 34 | 12 | 6  | 18 | 19      | 39 | 2  |
| 5 | 24 | 16 | 33 | 49 | 39      | 42 | 3  |
| 5 | 21 | 20 | 15 | 35 | 12.6316 | 53 | 5  |
| 5 | 22 | 12 | 9  | 21 | 16      | 49 | 11 |
| 2 | 39 | 5  | 6  | 11 | 21      | 23 | 2  |
| 4 | 20 | 14 | 20 | 34 | 20      | 43 | 2  |
| 4 | 21 | 18 | 33 | 51 | 20      | 45 | 9  |
| 5 | 14 | 19 | 7  | 26 | 45      | 52 | 9  |
| 3 | 33 | 16 | 7  | 23 | 21      | 39 | 7  |
| 4 | 20 | 14 | 39 | 53 | 54      | 52 | 12 |
| 5 | 10 | 24 | 42 | 66 | 55      | 66 | 9  |
| 5 | 19 | 21 | 21 | 42 | 54      | 45 | 11 |
| 2 | 28 | 9  | 30 | 39 | 56      | 44 | 7  |
| 3 | 31 | 16 | 27 | 43 | 15      | 41 | 2  |
| 3 | 30 | 4  | 8  | 12 | 22      | 36 | 4  |
| 3 | 27 | 17 | 17 | 34 | 55      | 52 | 10 |
| 5 | 17 | 19 | 34 | 53 | 21      | 40 | 7  |
| 3 | 31 | 14 | 10 | 24 | 29      | 26 | 6  |
| 5 | 10 | 24 | 38 | 62 | 53      | 52 | 10 |
| 2 | 35 | 7  | 7  | 14 | 62      | 37 | 15 |
| 3 | 20 | 19 | 42 | 61 | 33      | 48 | 14 |
| 5 | 15 | 12 | 36 | 48 | 22      | 49 | 11 |
| 1 | 41 | 12 | 2  | 14 | 24      | 21 | 2  |
| 1 | 28 | 9  | 17 | 26 | 59      | 35 | 12 |
| 1 | 33 | 18 | 28 | 46 | 25      | 48 | 8  |
| 4 | 20 | 17 | 25 | 42 | 51      | 46 | 4  |
| 5 | 12 | 16 | 30 | 46 | 53      | 52 | 12 |
| 3 | 17 | 15 | 39 | 54 | 72      | 51 | 8  |
| 3 | 32 | 20 | 14 | 34 | 28      | 37 | 1  |

|   |    |    |    |    |         |    |    |
|---|----|----|----|----|---------|----|----|
| 4 | 24 | 20 | 26 | 46 | 31      | 45 | 7  |
| 4 | 20 | 18 | 12 | 30 | 22      | 39 | 4  |
| 5 | 19 | 18 | 21 | 39 | 54      | 51 | 6  |
| 5 | 26 | 5  | 21 | 26 | 22      | 45 | 6  |
| 2 | 40 | 7  | 20 | 27 | 6       | 31 | 3  |
| 5 | 14 | 19 | 40 | 59 | 63      | 51 | 7  |
| 4 | 25 | 17 | 38 | 55 | 24      | 40 | 2  |
| 4 | 25 | 8  | 11 | 19 | 7       | 37 | 8  |
| 4 | 21 | 22 | 30 | 52 | 37      | 49 | 9  |
| . | .  | .  | .  | .  | .       | .  | .  |
| 5 | 19 | 8  | 11 | 19 | 63      | 38 | 11 |
| . | .  | .  | .  | .  | .       | .  | .  |
| 3 | 23 | 20 | 30 | 50 | 34      | 47 | 5  |
| 5 | 15 | 20 | 34 | 54 | 73.6842 | .  | 13 |
| 3 | 25 | 18 | 42 | 60 | 41      | 48 | 10 |
| . | .  | .  | .  | .  | .       | .  | .  |
| 2 | 29 | 10 | 31 | 41 | 44      | 33 | 4  |
| 2 | 22 | 12 | 17 | 29 | 29      | 52 | 2  |
| 4 | 25 | 19 | 27 | 46 | .       | 50 | 6  |
| 4 | 20 | 11 | 22 | 33 | 14      | 51 | 4  |
| 5 | 20 | 11 | 15 | 26 | 43      | 46 | 12 |
| 3 | 22 | 18 | 31 | 49 | 51      | 37 | 8  |
| 4 | 24 | 7  | 11 | 18 | 22      | 38 | 8  |
| . | .  | .  | .  | .  | .       | .  | .  |
| 5 | 15 | 24 | 36 | 60 | 46      | 46 | 10 |
| 3 | 25 | 5  | 3  | 8  | 82      | 32 | 10 |
| 3 | 33 | 0  | 36 | 36 | 66      | 45 | 2  |
| 3 | 30 | 15 | 30 | 45 | 34      | 41 | 4  |
| . | .  | .  | .  | .  | .       | .  | .  |
| 1 | 39 | 9  | 3  | 12 | 28      | 32 | 2  |

| d7_had_anx | d7_dallas_daily | d7_dallas_work | d7_dallas_anxdep | d7_dallas_social | d30_attend | d30_bbq_coll |
|------------|-----------------|----------------|------------------|------------------|------------|--------------|
| 17         | 82.2            | 74             | 74               | 72               | Yes        | Yes          |
| 5          | 67.2            | 74             | 20               | 38               | No         |              |
| 9          | 60.6            | 67             | 60               | 67               | Yes        | Yes          |
| 11         | 73.2            | 81             | 60               | 55               | Yes        | Yes          |
| 9          | 69.6            | 61             | 46               | 34               | Yes        | Yes          |
| 14         | 73.2            | 67             | 60               | 60               | Yes        | Yes          |
| 13         | 46.2            | 74             | 47               | 28               | No         |              |
| 13         | 69.6            | 60             | 60               | 31               | Yes        | Yes          |
| 13         | 61.2            | .              | 60               | 60               | Yes        | Yes          |
| 13         | 52.2            | 74             | 60               | 54               | Yes        | Yes          |
| 10         | 49.8            | 60             | 40               | 40               | Yes        | Yes          |
| 10         | 55.2            | 48             | 40               | 14               | Yes        | Yes          |
| 6          | 46.2            | 41             | 53               | 33               | Yes        | Yes          |
| 7          | 43.8            | 33             | 7                | 13               | Yes        | Yes          |
| 4          | 45              | 20             | 0                | 12               | Yes        | Yes          |
| 9          | 61.8            | 74             | 46               | 47               | Yes        | Yes          |
| 11         | 64.8            | 66             | 60               | 67               | No         |              |
| 4          | 58.8            | 61             | 6                | 25               | Yes        | Yes          |
| 15         | 64.8            | 81             | 80               | 74               | Yes        | Yes          |
| 15         | 64.2            | 67             | 74               | 46               | Yes        | Yes          |
| 15         | 70.2            | 60             | 60               | 60               | No         |              |
| 15         | 73.2            | 60             | 73               | 73               | No         |              |
| 21         | 78              | 94             | 86               | 80               | Yes        | Yes          |
| .          | 49.2            | 74             | 60               | 80               | Yes        | Yes          |
| 10         | 50.4            | 53             | 47               | 40               | Yes        | Yes          |
| 11         | 51              | 34             | 19               | 14               | Yes        | Yes          |
| 11         | 46.8            | 33             | 40               | 47               | Yes        | Yes          |
| 17         | 43.8            | 80             | 67               | 61               | Yes        | Yes          |
| 7          | 72.6            | 67             | 60               | 59               | Yes        | Yes          |
| .          | .               | .              | .                | .                | No         |              |
| 8          | 49.2            | 39             | 40               | 33               | Yes        | Yes          |
| 15         | 39              | 14             | 68               | 0                | Yes        | Yes          |
| 3          | 36              | 25             | 0                | 0                | Yes        | Yes          |
| 6          | 58.2            | 60             | 60               | 80               | Yes        | Yes          |
| .          | .               | .              | .                | .                | No         |              |
| 12         | 63.6            | 81             | 53               | 60               | Yes        | Yes          |
| 8          | 62.4            | 74             | 60               | 53               | Yes        | Yes          |
| 10         | 69.6            | 47             | 40               | 33               | Yes        | Yes          |
| 9          | 67.2            | 53             | 20               | 32               | Yes        | Yes          |
| 12         | 52.2            | 60             | 60               | 60               | No         |              |
| 7          | 26.4            | 34             | 25               | 20               | Yes        | No           |
| 7          | 57.6            | 61             | 60               | 61               | Yes        | Yes          |
| 5          | 37.8            | 20             | 14               | 7                | Yes        | Yes          |
| 4          | 44.4            | 14             | 13               | 7                | Yes        | Yes          |
| 8          | 32.4            | 27             | 26               | 0                | Yes        | Yes          |
| 20         | 58.2            | 67             | 68               | 47               | Yes        | Yes          |
| 5          | 55.2            | 60             | 33               | 0                | Yes        | Yes          |
| 14         | 38.4            | 46             | 21               | 12               | No         |              |

|    |      |    |     |    |     |     |
|----|------|----|-----|----|-----|-----|
| 16 | 53.4 | 67 | 100 | 34 | Yes | Yes |
| 4  | 38.4 | 46 | 6   | 14 | Yes | Yes |
| 5  | 72.6 | 53 | 0   | 12 | Yes | Yes |
| 6  | 43.8 | 34 | 20  | 13 | Yes | Yes |
| 11 | 61.8 | 68 | 67  | 26 | Yes | Yes |
| 11 | 56.4 | 48 | 13  | 19 | Yes | Yes |
| 5  | 42.6 | 67 | 27  | 13 | Yes | Yes |
| 5  | 40.2 | 27 | 33  | 27 | Yes | Yes |
| 11 | 49.2 | 74 | 66  | 73 | Yes | Yes |
| 6  | 49.8 | 47 | 20  | 12 | Yes | Yes |
| 8  | 52.2 | 35 | 46  | 35 | Yes | Yes |
| .  | 82.2 | 87 | 32  | 33 | Yes | Yes |
| 9  | 37.8 | 61 | 20  | 13 | Yes | Yes |
| 11 | 52.2 | 60 | 46  | 19 | Yes | Yes |
| 13 | 61.2 | 61 | 54  | 60 | Yes | Yes |
| 9  | 53.4 | 80 | 6   | 40 | Yes | Yes |
| 8  | 68.4 | 61 | 26  | 19 | Yes | Yes |
| 10 | 64.2 | 67 | 53  | 20 | Yes | Yes |
| 6  | 55.2 | 47 | 27  | 12 | Yes | Yes |
| 16 | 64.2 | 67 | 67  | 53 | Yes | Yes |
| 11 | 58.2 | 60 | 33  | 33 | Yes | Yes |
| 11 | 44.4 | 39 | 32  | 6  | Yes | Yes |
| 4  | 39   | 54 | 6   | 12 | Yes | Yes |
| 10 | 49.8 | 40 | 26  | 37 | Yes | Yes |
| 9  | 52.2 | 40 | 41  | 40 | Yes | Yes |
| 4  | 30   | 7  | 0   | 6  | Yes | Yes |
| 10 | 41.4 | 26 | 14  | 13 | Yes | Yes |
| 9  | 55.8 | 54 | 26  | 34 | Yes | Yes |
| 11 | 70.2 | 53 | 60  | 59 | Yes | Yes |
| 7  | 47.4 | 46 | 34  | 34 | Yes | Yes |
| 14 | 75.6 | 74 | 60  | 54 | Yes | Yes |
| 10 | 84.6 | 68 | 94  | 87 | Yes | Yes |
| 16 | 76.2 | 53 | 54  | 46 | Yes | Yes |
| 13 | 43.2 | 47 | 26  | 21 | Yes | Yes |
| 6  | 36   | 33 | 6   | 0  | Yes | Yes |
| 5  | 47.4 | 33 | 34  | 21 | Yes | Yes |
| 13 | 67.2 | 60 | 53  | 53 | Yes | Yes |
| 11 | 41.4 | 34 | 33  | 0  | Yes | Yes |
| 7  | 55.2 | 46 | 47  | 6  | Yes | Yes |
| 18 | 52.8 | 53 | 73  | 40 | Yes | Yes |
| 15 | 76.2 | 87 | 80  | 67 | Yes | Yes |
| 9  | 58.2 | 61 | 53  | 39 | Yes | Yes |
| 10 | 61.8 | 55 | 40  | 32 | Yes | Yes |
| 12 | 49.2 | 32 | 0   | 12 | Yes | Yes |
| 8  | 64.2 | 60 | 53  | 46 | Yes | Yes |
| 9  | 25.8 | 40 | 26  | 14 | Yes | Yes |
| 5  | 70.2 | 60 | 25  | 13 | Yes | Yes |
| 10 | 47.4 | 60 | 87  | 60 | Yes | Yes |
| 7  | 78.6 | 87 | 39  | 67 | Yes | Yes |
| 8  | 49.2 | 27 | 13  | 21 | Yes | Yes |

|    |      |    |    |    |     |     |
|----|------|----|----|----|-----|-----|
| 7  | 49.2 | 47 | 20 | 20 | Yes | Yes |
| 10 | 43.8 | 40 | 33 | 6  | Yes | Yes |
| 10 | 73.8 | 54 | 33 | 72 | Yes | Yes |
| 13 | 49.2 | 54 | 40 | 60 | Yes | Yes |
| 9  | 36   | 35 | 7  | 12 | Yes | Yes |
| 15 | 78.6 | 74 | 67 | 20 | Yes | Yes |
| 3  | 43.8 | 34 | 13 | 0  | Yes | Yes |
| 15 | 22.2 | 39 | 34 | 21 | Yes | Yes |
| 7  | 64.2 | 54 | 60 | 40 | No  |     |
| .  | .    | .  | .  | .  | No  |     |
| 10 | 68.4 | 54 | 33 | 54 | No  |     |
| .  | .    | .  | .  | .  | No  |     |
| 11 | 58.8 | 73 | 60 | 67 | No  |     |
| 13 | 67.2 | 53 | 54 | 47 | No  |     |
| 12 | 61.8 | 67 | 46 | 39 | No  |     |
| .  | .    | .  | .  | .  | No  |     |
| 9  | 67.2 | 67 | 33 | 47 | Yes | Yes |
| 7  | 37.8 | 39 | 12 | 6  | Yes | Yes |
| 12 | 73.2 | 74 | 80 | 87 | Yes | Yes |
| 7  | 48.6 | 47 | 26 | 20 | No  |     |
| 16 | 58.2 | 67 | 67 | 61 | No  |     |
| 11 | 61.2 | 60 | 33 | 47 | No  |     |
| 8  | 46.2 | 47 | 20 | 40 | No  |     |
| .  | .    | .  | .  | .  | No  |     |
| 16 | 62.4 | 53 | 67 | 33 | Yes | Yes |
| 10 | 61.2 | 60 | 46 | 54 | No  |     |
| 7  | 79.2 | 80 | 66 | 26 | No  |     |
| 14 | 49.8 | 53 | 7  | 0  | No  |     |
| .  | .    | .  | .  | .  | No  |     |
| 9  | 52.8 | 13 | 0  | 6  | No  |     |

| d30_bbq_comp | d30_bbq_nfill | d30_bbq | d30_fabq_phys | d30_fabq_work | d30_fabq | d30_quebec |
|--------------|---------------|---------|---------------|---------------|----------|------------|
| Yes          | 0             | 20      | 17            | .             | .        | 53         |
|              | 14            | .       | .             | .             | .        | .          |
| Yes          | 0             | 32      | 2             | .             | .        | 23         |
| Yes          | 0             | 20      | 16            | 38            | 54       | .          |
| Yes          | 0             | 27      | 9             | 42            | 51       | 44.2105    |
| Yes          | 0             | 41      | 2             | 11            | 13       | 12         |
|              | 14            | .       | .             | .             | .        | .          |
| Yes          | 0             | 19      | 2             | 14            | 16       | 37.8947    |
| Yes          | 0             | 18      | 10            | .             | .        | 52         |
| Yes          | 0             | 21      | 16            | 39            | 55       | 31         |
| Yes          | 0             | 28      | 8             | 38            | 46       | 52         |
| Yes          | 0             | 27      | 13            | 30            | 43       | 24         |
| Yes          | 0             | 19      | 21            | .             | .        | 17         |
| Yes          | 0             | 26      | 5             | 36            | 41       | 5          |
| Yes          | 0             | 22      | 13            | 34            | 47       | 26         |
| Yes          | 0             | 18      | 10            | 42            | 52       | 30         |
|              | 14            | .       | .             | .             | .        | .          |
| Yes          | 0             | 28      | 18            | 42            | 60       | 28         |
| Yes          | 0             | 26      | 1             | 40            | 41       | 23         |
| Yes          | 0             | 23      | 20            | 34            | 54       | 45         |
|              | 14            | .       | .             | .             | .        | .          |
|              | 14            | .       | .             | .             | .        | .          |
| Yes          | 0             | 28      | 12            | 18            | 30       | 42         |
| Yes          | 0             | 41      | 0             | 25            | 25       | 3          |
| Yes          | 0             | 25      | 15            | 0             | 15       | 26         |
| Yes          | 0             | 19      | 2             | 40            | 42       | 22         |
| Yes          | 0             | 25      | 6             | 8             | 14       | 12         |
| Yes          | 0             | 21      | 1             | 4             | 5        | 14         |
| Yes          | 0             | 29      | 2             | 19            | 21       | 22         |
|              | 14            | .       | .             | .             | .        | .          |
| Yes          | 0             | 30      | 10            | 0             | 10       | 19         |
| Yes          | 0             | 25      | 7             | 37            | 44       | 12         |
| Yes          | 0             | 22      | 4             | 18            | 22       | 5          |
| Yes          | 0             | 37      | 2             | 2             | 4        | 18         |
|              | 14            | .       | .             | .             | .        | .          |
| Yes          | 0             | 23      | 22            | 36            | 58       | 72         |
| Yes          | 0             | 21      | 13            | 38            | 51       | 48         |
| Yes          | 0             | 25      | 12            | 10            | 22       | 36         |
| Yes          | 0             | 11      | 24            | 42            | 66       | 74         |
|              | 14            | .       | .             | .             | .        | .          |
| No           | 14            | .       | .             | .             | .        | .          |
| Yes          | 0             | 31      | 10            | 18            | 28       | 11         |
| Yes          | 0             | 23      | 0             | 8             | 8        | 2          |
| Yes          | 1             | 36      | 2             | 0             | 2        | 14         |
| Yes          | 0             | 30      | 13            | 2             | 15       | 2          |
| Yes          | 0             | 21      | 15            | 24            | 39       | 27         |
| Yes          | 0             | 37      | 2             | 12            | 14       | 17         |
|              | 14            | .       | .             | .             | .        | .          |

|     |   |    |    |    |    |        |
|-----|---|----|----|----|----|--------|
| Yes | 0 | 30 | 12 | 22 | 34 | 22     |
| Yes | 0 | 33 | 0  | 4  | 4  | 3      |
| Yes | 0 | 30 | 11 | 29 | 40 | 54     |
| Yes | 0 | 30 | 12 | 10 | 22 | 13     |
| Yes | 0 | 21 | 16 | 42 | 58 | 38     |
| Yes | 0 | 34 | 0  | 0  | 0  | 15     |
| Yes | 1 | 27 | 16 | 20 | 36 | 13     |
| Yes | 0 | 44 | 0  | 4  | 4  | 2.1053 |
| Yes | 0 | 24 | 3  | 21 | 24 | 27     |
| Yes | 0 | 32 | 8  | 9  | 17 | 20     |
| Yes | 0 | 30 | 5  | 17 | 22 | 4      |
| Yes | 0 | 20 | 10 | 4  | 14 | 11     |
| Yes | 0 | 30 | 4  | 15 | 19 | 17     |
| Yes | 0 | 35 | 12 | 15 | 27 | 18     |
| Yes | 0 | 25 | 12 | 29 | 41 | 52     |
| Yes | 0 | 27 | 2  | 38 | 40 | 25     |
| Yes | 0 | 29 | 12 | 23 | 35 | 24     |
| Yes | 0 | 24 | 5  | 32 | 37 | 34     |
| Yes | 0 | 30 | 3  | 8  | 11 | 15     |
| Yes | 0 | 29 | 3  | 25 | 28 | 24     |
| Yes | 0 | 23 | 6  | 28 | 34 | 19     |
| Yes | 0 | 35 | 6  | 4  | 10 | 14     |
| Yes | 0 | 40 | 5  | 29 | 34 | 13     |
| Yes | 0 | 33 | 1  | 18 | 19 | 7.3684 |
| Yes | 0 | 23 | 7  | 11 | 18 | 2      |
| Yes | 0 | 43 | 0  | 2  | 2  | 20     |
| Yes | 0 | 27 | 16 | 12 | 28 | 18     |
| Yes | 0 | 20 | 16 | 35 | 51 | 25     |
| Yes | 0 | 22 | 15 | 7  | 22 | 50     |
| Yes | 0 | 32 | 2  | 5  | 7  | 14     |
| Yes | 0 | 28 | 5  | 42 | 47 | 38     |
| Yes | 0 | 11 | 21 | 42 | 63 | 54     |
| Yes | 0 | 25 | 12 | 15 | 27 | 35     |
| Yes | 0 | 43 | 0  | 8  | 8  | 11     |
| Yes | 0 | 37 | 5  | 18 | 23 | 3      |
| Yes | 0 | 33 | 1  | 3  | 4  | 14     |
| Yes | 0 | 37 | 0  | 5  | 5  | 7      |
| Yes | 0 | 26 | 15 | 27 | 42 | 18     |
| Yes | 0 | 31 | 9  | 3  | 12 | 27     |
| Yes | 0 | 19 | 0  | 40 | 40 | 51     |
| Yes | 0 | 33 | 0  | 36 | 36 | 53     |
| Yes | 0 | 29 | 2  | 42 | 44 | 23     |
| Yes | 0 | 41 | 0  | 42 | 42 | 0      |
| Yes | 0 | 41 | 8  | 0  | 8  | 21     |
| Yes | 0 | 29 | 8  | 17 | 25 | 54     |
| Yes | 0 | 23 | 6  | 21 | 27 | 8      |
| Yes | 0 | 22 | 16 | 28 | 44 | 43     |
| Yes | 0 | 20 | 11 | 31 | 42 | 49     |
| Yes | 0 | 20 | 6  | 33 | 39 | 53     |
| Yes | 0 | 39 | 8  | 2  | 10 | 1      |

|     |    |    |    |    |    |         |
|-----|----|----|----|----|----|---------|
| Yes | 0  | 26 | 0  | 15 | 15 | 15.7895 |
| Yes | 0  | 44 | 7  | 2  | 9  | 4       |
| Yes | 0  | 25 | 13 | 17 | 30 | 49      |
| Yes | 0  | 32 | 0  | 19 | 19 | 16      |
| Yes | 0  | 38 | 3  | 13 | 16 | 8       |
| Yes | 0  | 18 | 15 | 41 | 56 | 41      |
| Yes | 0  | 25 | 2  | 28 | 30 | 9       |
| Yes | 0  | 30 | 4  | 31 | 35 | 0       |
|     | 14 | .  | .  | .  | .  | .       |
|     | 14 | .  | .  | .  | .  | .       |
|     | 14 | .  | .  | .  | .  | .       |
|     | 14 | .  | .  | .  | .  | .       |
|     | 14 | .  | .  | .  | .  | .       |
|     | 14 | .  | .  | .  | .  | .       |
|     | 14 | .  | .  | .  | .  | .       |
|     | 14 | .  | .  | .  | .  | .       |
|     | 14 | .  | .  | .  | .  | .       |
| Yes | 0  | 35 | 5  | 29 | 34 | 35      |
| Yes | 0  | 37 | 1  | 10 | 11 | 9       |
| Yes | 0  | 25 | 17 | 23 | 40 | 40      |
|     | 14 | .  | .  | .  | .  | .       |
|     | 14 | .  | .  | .  | .  | .       |
|     | 14 | .  | .  | .  | .  | .       |
|     | 14 | .  | .  | .  | .  | .       |
|     | 14 | .  | .  | .  | .  | .       |
| Yes | 0  | 21 | 24 | 33 | 57 | 50.5263 |
|     | 14 | .  | .  | .  | .  | .       |
|     | 14 | .  | .  | .  | .  | .       |
|     | 14 | .  | .  | .  | .  | .       |
|     | 14 | .  | .  | .  | .  | .       |
|     | 14 | .  | .  | .  | .  | .       |



| d30_tampa | d1d7_bbq | d1d7_fabq | d1d7_tampa | d7d30_bbq | d7d30_fabq_phys | d7d30_fabq_work |
|-----------|----------|-----------|------------|-----------|-----------------|-----------------|
| 44        | 1        | 20        | 16         | 7         | -4              | .               |
| .         | 7        | -6        | -1         | .         | .               | .               |
| 35        | 0        | 7         | 1          | 16        | -20             | .               |
| .         | 4        | -10       | 6          | -2        | 1               | 4               |
| .         | 5        | -4        | -7         | 3         | -9              | 5               |
| 21        | 5        | -12       | -4         | 15        | -15             | -3              |
| .         | 4        | -12       | -4         | .         | .               | .               |
| 41        | -5       | .         | .          | 1         | -14             | 1               |
| 50        | -1       | .         | 4          | 3         | -6              | .               |
| 43        | 11       | -20       | -4         | -3        | 12              | 4               |
| 40        | 3        | 6         | 1          | 5         | -11             | 0               |
| 46        | -7       | 7         | 2          | -2        | -2              | -1              |
| 42        | -2       | 9         | 0          | 3         | -1              | .               |
| 32        | -4       | -6        | -5         | 12        | -7              | -1              |
| 41        | 2        | -3        | 5          | -1        | -1              | 12              |
| 38        | 2        | -2        | .          | 2         | -7              | 0               |
| .         | 7        | 2         | 2          | .         | .               | .               |
| 44        | .        | .         | .          | 3         | -6              | 0               |
| 39        | 2        | -3        | .          | 5         | -16             | 4               |
| 40        | 0        | -14       | 4          | -2        | 12              | -7              |
| .         | .        | 9         | .          | .         | .               | .               |
| .         | -4       | -20       | .          | .         | .               | .               |
| 39        | 4        | -3        | 1          | 0         | 2               | -8              |
| 30        | -12      | .         | -6         | 16        | -24             | -14             |
| 44        | 2        | 7         | -6         | 7         | -5              | -7              |
| 39        | 0        | 14        | 3          | 2         | -16             | -2              |
| 40        | 7        | 8         | -8         | 1         | -5              | -8              |
| .         | 3        | 20        | -2         | 1         | -16             | -13             |
| 37        | 2        | -7        | -6         | 12        | -15             | -14             |
| .         | .        | .         | .          | .         | .               | .               |
| 33        | 0        | -8        | -3         | -2        | -2              | 0               |
| 33        | 3        | 1         | -6         | 7         | 0               | 5               |
| 25        | 1        | -1        | -6         | -3        | -8              | 4               |
| 31        | 1        | -13       | -3         | 22        | -13             | -14             |
| .         | .        | .         | .          | .         | .               | .               |
| 49        | 1        | 0         | 4          | 2         | 1               | 6               |
| 41        | 2        | -2        | 6          | 0         | -5              | 3               |
| 42        | -3       | 1         | 2          | -1        | -2              | 1               |
| 56        | 1        | -1        | 11         | -8        | 6               | 8               |
| .         | 3        | 11        | -2         | .         | .               | .               |
| .         | 4        | 7         | 5          | .         | .               | .               |
| 33        | 0        | 0         | -1         | 11        | -7              | -6              |
| 29        | 7        | 3         | 4          | -4        | -11             | -1              |
| 28        | 1        | -3        | -13        | 4         | -2              | 0               |
| 37        | -2       | -2        | 7          | 1         | 0               | -11             |
| 26        | -4       | -1        | 4          | 3         | 2               | -1              |
| 34        | 13       | -21       | .          | 4         | -11             | -12             |
| .         | 2        | 0         | -5         | .         | .               | .               |

|    |     |     |     |     |     |     |
|----|-----|-----|-----|-----|-----|-----|
| 39 | 2   | 4   | 7   | 17  | -9  | -18 |
| 23 | 5   | -19 | 4   | 5   | -3  | 0   |
| 36 | -5  | 3   | 3   | 7   | -8  | -1  |
| 38 | -1  | 5   | -4  | 10  | -8  | 0   |
| 49 | 2   | -1  | -5  | 3   | -4  | 0   |
| 24 | -1  | 4   | -2  | 7   | -16 | -9  |
| 33 | 2   | -23 | 1   | 1   | 1   | 9   |
| 29 | 6   | -7  | 12  | 13  | -10 | -8  |
| 23 | 7   | -13 | -15 | -1  | -4  | -19 |
| 36 | 1   | -23 | -3  | -6  | -4  | 1   |
| 28 | 6   | -14 | -3  | 1   | -1  | -3  |
| 43 | 4   | 9   | -2  | -9  | -3  | -17 |
| 33 | -6  | -6  | 6   | 6   | -8  | -13 |
| 31 | 6   | .   | .   | 1   | 10  | 9   |
| 45 | 2   | 1   | -7  | 2   | -7  | -10 |
| 32 | 1   | -11 | -2  | 2   | -1  | 6   |
| 36 | 4   | -8  | -1  | 2   | -5  | -6  |
| 43 | 3   | -15 | -6  | 3   | -9  | -4  |
| 36 | -3  | 0   | -1  | 3   | -10 | -6  |
| 45 | -4  | 28  | 1   | 11  | -11 | -13 |
| 47 | 8   | 0   | -6  | 2   | -13 | -1  |
| 30 | 0   | -2  | -1  | 1   | -6  | -2  |
| 32 | 1   | 5   | -2  | 16  | -11 | -4  |
| 29 | -4  | -16 | 7   | 12  | -19 | 3   |
| 35 | 1   | -6  | .   | 1   | -5  | 2   |
| 19 | 3   | 7   | -2  | 4   | -5  | -4  |
| 33 | -4  | 4   | 0   | 7   | 2   | -8  |
| 43 | 1   | 3   | 3   | -1  | -2  | 2   |
| 42 | -5  | 0   | 5   | 8   | -4  | 0   |
| 34 | -1  | 1   | -2  | -1  | -14 | -2  |
| 44 | 2   | -11 | 3   | 8   | -9  | 3   |
| 63 | -2  | 1   | 6   | 1   | -3  | 0   |
| 32 | -2  | 2   | 1   | 6   | -9  | -6  |
| 34 | 0   | 4   | 4   | 15  | -9  | -22 |
| 31 | 2   | 2   | 1   | 6   | -11 | -9  |
| .  | 4   | -9  | 4   | 3   | -3  | -5  |
| 26 | 4   | 8   | 2   | 10  | -17 | -12 |
| 40 | 0   | -1  | -9  | 9   | -4  | -7  |
| 29 | 10  | -2  | -9  | 0   | -5  | -7  |
| 49 | -10 | 8   | 6   | 9   | -24 | 2   |
| 44 | 22  | -44 | -14 | -2  | -7  | 29  |
| 36 | 0   | -2  | 2   | 9   | -17 | 0   |
| 23 | -4  | -3  | 2   | 26  | -12 | 6   |
| 22 | 10  | -4  | 1   | 0   | -4  | -2  |
| 32 | -3  | -12 | 4   | 1   | -1  | 0   |
| 26 | 10  | 2   | 10  | -10 | -12 | -7  |
| 45 | -1  | -2  | 4   | 2   | -1  | 3   |
| 45 | -7  | .   | 1   | 8   | -5  | 1   |
| 41 | -3  | 8   | 7   | 3   | -9  | -6  |
| 24 | 7   | -3  | -7  | 7   | -12 | -12 |

|    |     |     |     |    |     |     |
|----|-----|-----|-----|----|-----|-----|
| 39 | -1  | 10  | 2   | 2  | -20 | -11 |
| 24 | -2  | .   | 10  | 24 | -11 | -10 |
| 48 | -10 | 7   | 3   | 6  | -5  | -4  |
| 47 | -5  | -17 | -3  | 6  | -5  | -2  |
| 30 | 9   | -3  | 3   | -2 | -4  | -7  |
| 46 | 0   | -1  | -2  | 4  | -4  | 1   |
| 35 | -1  | 18  | -3  | 0  | -15 | -10 |
| 28 | 7   | -32 | .   | 5  | -4  | 20  |
| .  | 3   | 8   | 6   | .  | .   | .   |
| .  | .   | .   | .   | .  | .   | .   |
| .  | -3  | -10 | -1  | .  | .   | .   |
| .  | .   | .   | .   | .  | .   | .   |
| .  | 5   | -3  | -1  | .  | .   | .   |
| .  | 1   | 1   | .   | .  | .   | .   |
| .  | 4   | 9   | 1   | .  | .   | .   |
| .  | .   | .   | .   | .  | .   | .   |
| 29 | 3   | -8  | -11 | 6  | -5  | -2  |
| 36 | -13 | 29  | 22  | 15 | -11 | -7  |
| 36 | -5  | 0   | 4   | 0  | -2  | -4  |
| .  | -2  | -8  | 6   | .  | .   | .   |
| .  | 2   | -22 | 3   | .  | .   | .   |
| .  | 1   | -7  | -9  | .  | .   | .   |
| .  | -9  | 6   | 1   | .  | .   | .   |
| .  | .   | .   | .   | .  | .   | .   |
| .  | -2  | 0   | .   | 6  | 0   | -3  |
| .  | -4  | -9  | 1   | .  | .   | .   |
| .  | 15  | -30 | -6  | .  | .   | .   |
| .  | 15  | -15 | -11 | .  | .   | .   |
| .  | .   | .   | .   | .  | .   | .   |
| .  | 4   | 0   | -4  | .  | .   | .   |

| d7d30_fabq | d7d30_tampa | d7d30_quebec |
|------------|-------------|--------------|
| .          | -19         | -28          |
| .          | .           | .            |
| .          | -17         | -5           |
| 5          | .           | .            |
| -4         | .           | -6.7895      |
| -18        | -26         | -35          |
| .          | .           | .            |
| -13        | -13         | -33.1053     |
| .          | -7          | 4            |
| 16         | 2           | -3           |
| -11        | -13         | 11           |
| -3         | 8           | 1            |
| .          | -3          | -13          |
| -8         | -16         | -10          |
| 11         | -5          | -14          |
| -7         | .           | -37          |
| .          | .           | .            |
| -6         | -7          | -9           |
| -12        | .           | -23          |
| 5          | 3           | -17          |
| .          | .           | .            |
| .          | .           | .            |
| -6         | -5          | -11          |
| -38        | -20         | -30          |
| -12        | -2          | -8           |
| -18        | -13         | -15          |
| -13        | -5          | -13          |
| -29        | .           | -20          |
| -29        | -11         | -34          |
| .          | .           | .            |
| -2         | -5          | -18          |
| 5          | 6           | -3           |
| -4         | -7          | -14          |
| -27        | -18         | -26          |
| .          | .           | .            |
| 7          | 3           | 3            |
| -2         | -2          | 2            |
| -1         | -1          | -6           |
| 14         | 6           | 38           |
| .          | .           | .            |
| .          | .           | .            |
| -13        | -13         | -26          |
| -12        | -12         | -10          |
| -2         | -2          | -7.0526      |
| -11        | -8          | -1           |
| 1          | -11         | -18          |
| -23        | .           | -14          |
| .          | .           | .            |

|     |     |         |
|-----|-----|---------|
| -27 | -21 | -19     |
| -3  | -11 | -4      |
| -9  | -4  | -18     |
| -8  | -13 | -6      |
| -4  | 0   | -4      |
| -25 | -24 | -27     |
| 10  | -3  | -12     |
| -18 | -17 | -5.2632 |
| -23 | -17 | -23     |
| -3  | -1  | -5      |
| -4  | -8  | -17     |
| -20 | 0   | -1      |
| -21 | -8  | -10     |
| 19  | -1  | -18     |
| -17 | -7  | -3      |
| 5   | -5  | -3      |
| -11 | -2  | -8      |
| -13 | -3  | 0       |
| -16 | -8  | -9      |
| -24 | -1  | -12     |
| -14 | 1   | -8      |
| -8  | -9  | -5      |
| -15 | -10 | -26     |
| -16 | -24 | -5.2632 |
| -3  | -14 | -14     |
| -9  | -4  | -1      |
| -6  | -10 | -2      |
| 0   | -2  | 5       |
| -4  | -10 | 5       |
| -16 | -5  | -7      |
| -6  | -8  | -16     |
| -3  | -3  | -1      |
| -15 | -13 | -19     |
| -31 | -10 | -45     |
| -20 | -10 | -12     |
| -8  | .   | -8      |
| -29 | -26 | -48     |
| -11 | 0   | -3      |
| -12 | 3   | -2      |
| -22 | -3  | -2      |
| 22  | 7   | -9      |
| -17 | -12 | -10     |
| -6  | -26 | -22     |
| -6  | 1   | -3      |
| -1  | -3  | -5      |
| -19 | -22 | -17     |
| 2   | -1  | -8      |
| -4  | -7  | -4      |
| -15 | -10 | -19     |
| -24 | -13 | -27     |

|     |     |          |
|-----|-----|----------|
| -31 | -6  | -15.2105 |
| -21 | -15 | -18      |
| -9  | -3  | -5       |
| -7  | 2   | -6       |
| -11 | -1  | 2        |
| -3  | -5  | -22      |
| -25 | -5  | -15      |
| 16  | -9  | -7       |
| .   | .   | .        |
| .   | .   | .        |
| .   | .   | .        |
| .   | .   | .        |
| .   | .   | .        |
| .   | .   | .        |
| .   | .   | .        |
| .   | .   | .        |
| .   | .   | .        |
| -7  | -4  | -9       |
| -18 | -16 | -20      |
| -6  | -14 | .        |
| .   | .   | .        |
| .   | .   | .        |
| .   | .   | .        |
| .   | .   | .        |
| .   | .   | .        |
| .   | .   | .        |
| -3  | .   | 4.5263   |
| .   | .   | .        |
| .   | .   | .        |
| .   | .   | .        |
| .   | .   | .        |
| .   | .   | .        |
